# Supplementary material for: Development of biomass waste-based carbon quantum dots and their potential application as non-toxic bioimaging agents
Source: Royal Society of Chemistry journal article supplement (doi:10.1039/d3ra05840a), 2023-01-01
Supplement: d3ra05840a1.pdf [file d3ra05840a1.pdf]

## Supporting Information

### **Development of biomass waste-based carbon quantum dots and their potential application as non-toxic bioimaging agents**

Norhidayah Abu<sup>1,2\*</sup>, Shanmugavel Chinnathambi<sup>3\*</sup>, Mahima Kumar<sup>3</sup>, Fatemeh Etezadi<sup>3</sup>,  
Noremylia Mohd Bakhori<sup>2</sup>, Zuhana Ahmad Zubir<sup>2</sup>, Shahrul Nizam Md Salleh<sup>2</sup>, Rafidah Hanim  
Shueb<sup>1</sup>, Subramani Karthikeyan<sup>4</sup>, Vaijayanthi Thangavel<sup>3</sup>, Jaafar Abdullah<sup>5\*</sup> and Ganesh N.  
Pandian<sup>3\*</sup>.

<sup>1</sup>Department of Medical Microbiology & Parasitology, School of Medical Sciences, Universiti Sains Malaysia, Health Campus, Kubang Kerian 16150, Kelantan, Malaysia

<sup>2</sup>Advanced Materials Research Centre (AMREC), SIRIM Berhad, Lot 34, Jalan Hi-Tech 2/3, Kulim, Hi-Tech Park, 09000 Kulim, Malaysia

<sup>3</sup>Institute for Integrated Cell-Material Sciences, Institute for Advanced Study, Kyoto University, Kyoto, Japan

<sup>4</sup>Centre for Healthcare Advancement, Innovation and Research, Vellore Institute of Technology, Chennai, 600 127, India

<sup>5</sup>Department of Chemistry, Faculty of Science, Universiti Putra Malaysia, UPM Serdang, Serdang 43400, Selangor, Malaysia

C.A. E-mail: nhidayah@sirim.my; chinnathambi.shanmugavel.8s@kyoto-u.ac.jp;  
jaafar@upm.edu.my; namasivayam.ganeshpandian.5z@kyoto-u.ac.jp

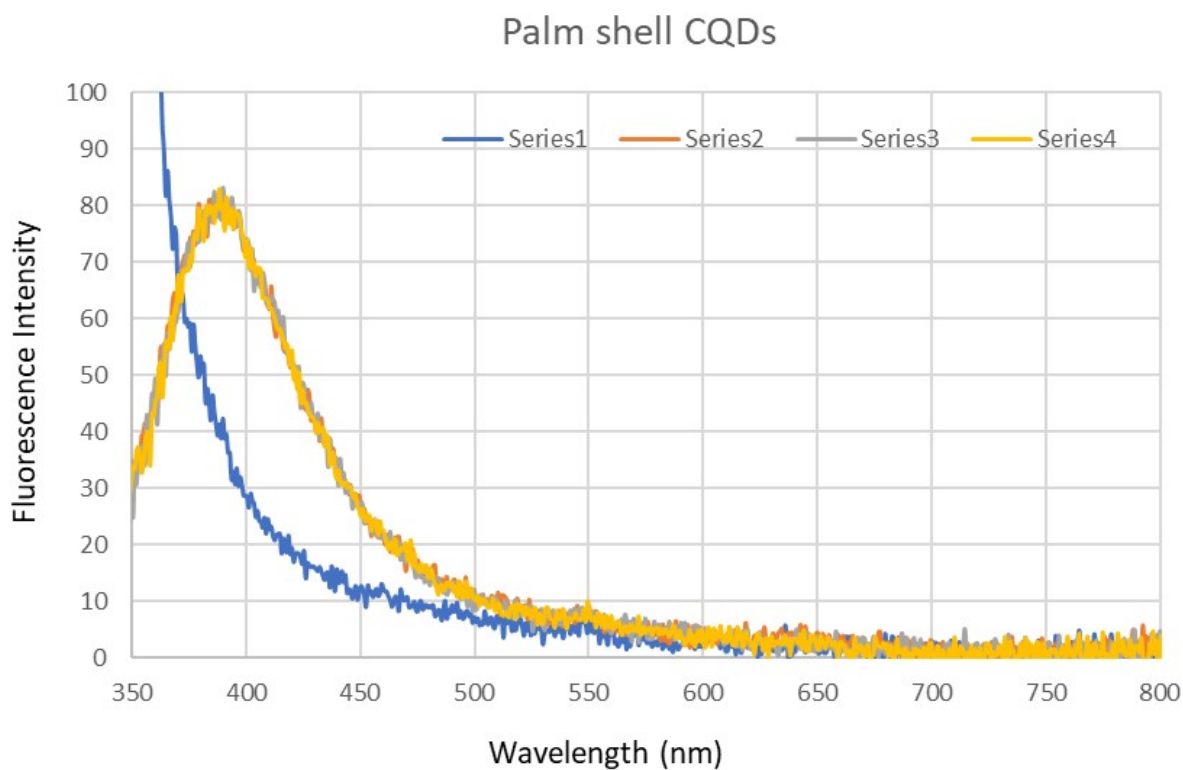

| Sample (n=3)                | Quantum Yield (%) | Abs   | Peak Wavelength | Peak Count | Peak FWHM |
|-----------------------------|-------------------|-------|-----------------|------------|-----------|
| Reference (Series 1)        | -----             | ----- | 371.88          | 65.27      | 141.66    |
| Palm shell CDs 1 (Series 2) | <b>2.4</b>        | 0.914 | 385.5           | 81.26      | 74.74     |
| Palm shell CDs 2 (Series 3) | <b>2.4</b>        | 0.914 | 390.04          | 83.2       | 69.04     |
| Palm shell CDs 3 (Series 4) | <b>2.3</b>        | 0.914 | 388.53          | 82.88      | 71.34     |

**Fig.S1** Palm shell carbon quantum dots and their absolute quantum yield measurements: Figure and its related parameters.

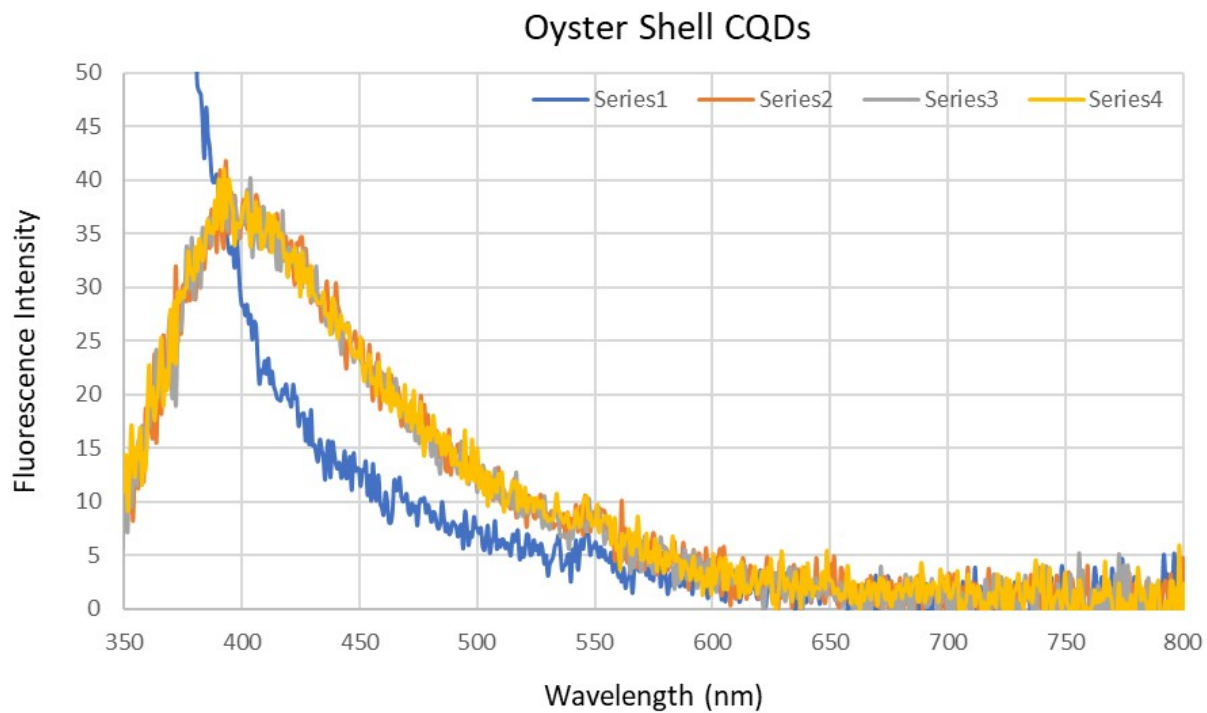

| Sample (n=3)                  | Quantum Yield (%) | Abs   | Peak Wavelength | Peak Count | Peak FWHM |
|-------------------------------|-------------------|-------|-----------------|------------|-----------|
| Reference (Series 1)          | ---               | ---   | 392.31          | 36.51      | 423.69    |
| Oyster shell CDs 1 (Series 2) | <b>1.4</b>        | 0.967 | 393.07          | 41.72      | 89.03     |
| Oyster shell CDs 2 (Series 3) | <b>1.3</b>        | 0.967 | 403.65          | 40.09      | 90.84     |
| Oyster shell CDs 3 (Series 4) | <b>1.4</b>        | 0.967 | 392.31          | 41.03      | 88.79     |

**Fig. S2** Oyster shell carbon quantum dots and their absolute quantum yield measurements: Figure and its related parameters.

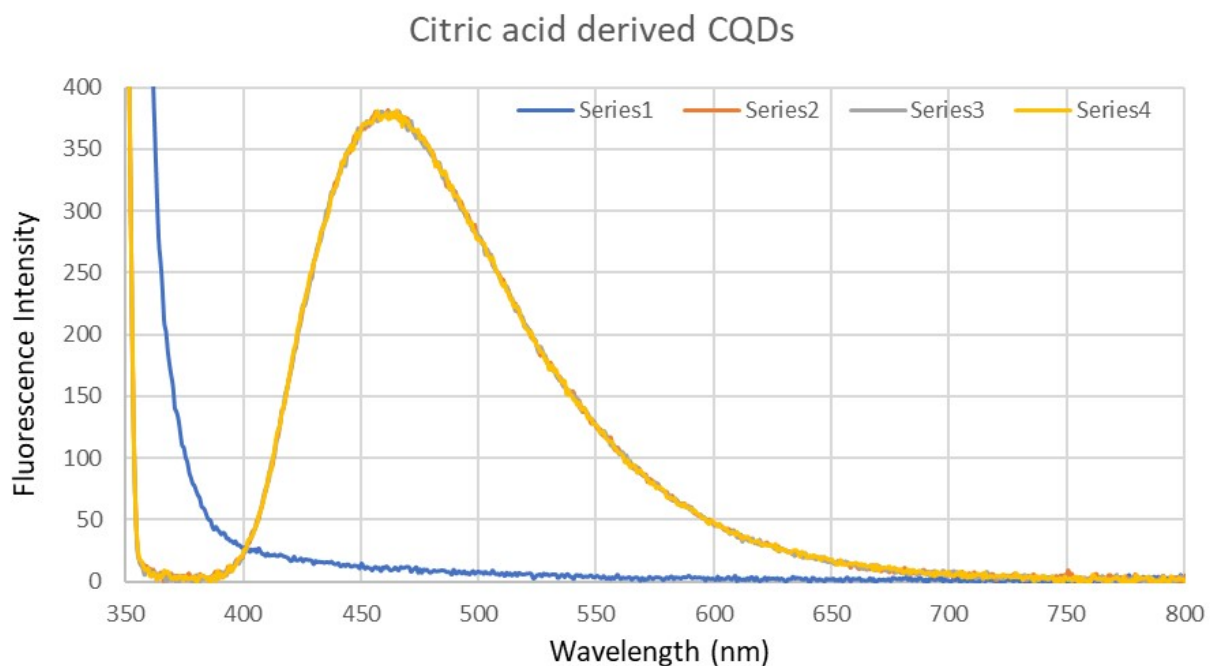

| Sample (n=3)         | Quantum Yield (%) | Abs   | Peak Wavelength | Peak Count | Peak FWHM |
|----------------------|-------------------|-------|-----------------|------------|-----------|
| Reference (Series 1) | ---               | ---   | 406.67          | 26.74      | 165.51    |
| CA CDs 1 (Series 2)  | <b>22.1</b>       | 0.986 | 461.72          | 381.47     | 102.29    |
| CA CDs 2 (Series 3)  | <b>22.1</b>       | 0.986 | 466.24          | 381.01     | 102.33    |
| CA CDs 3 (Series 4)  | <b>22.1</b>       | 0.986 | 465.49          | 381.46     | 103.04    |

**Fig. S3** Citric acid carbon quantum dots and their absolute quantum yield measurements: Figure and its related parameters.

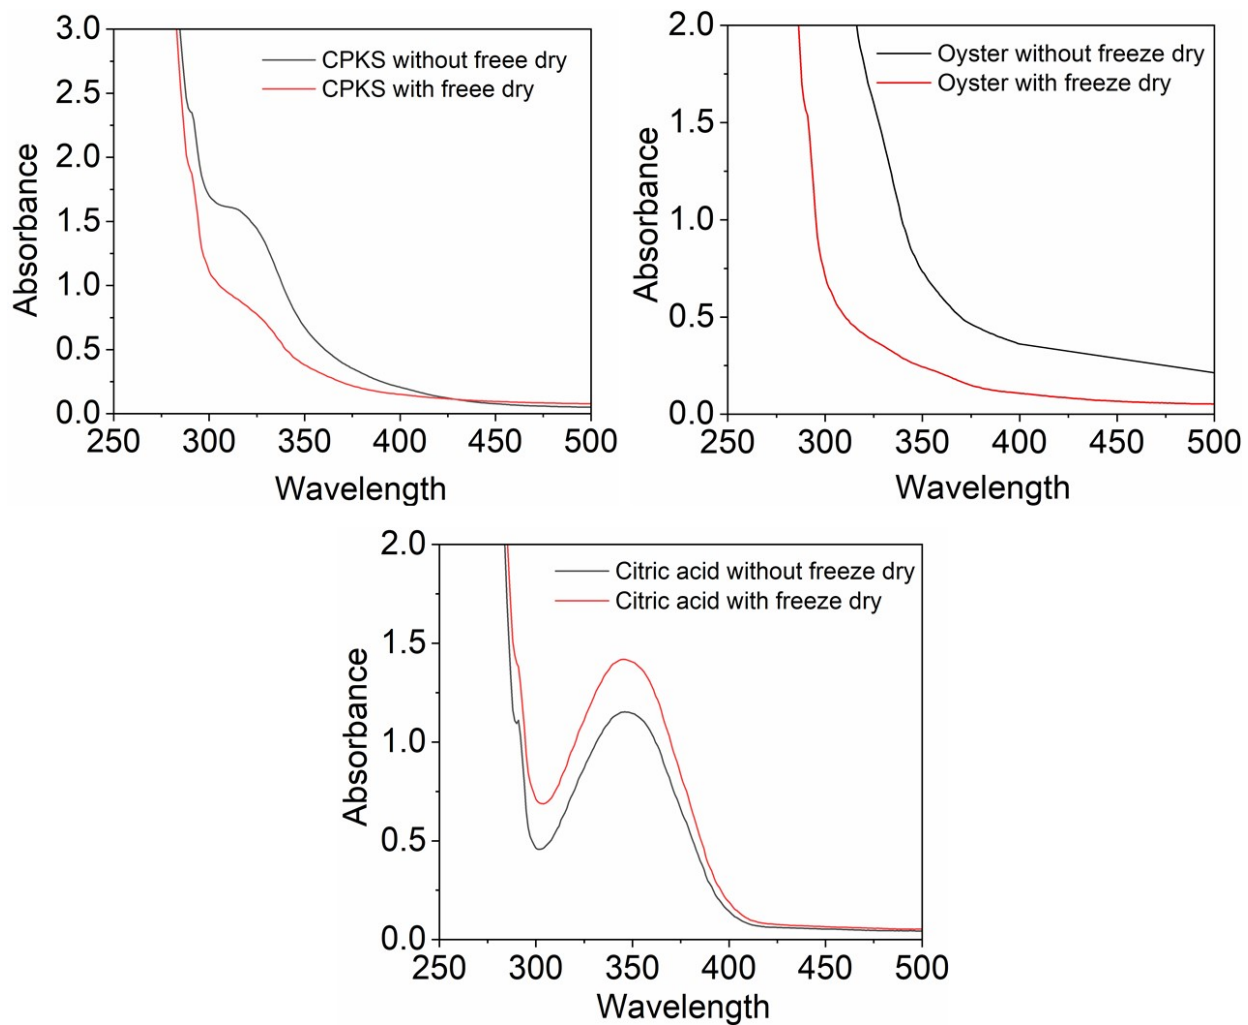

**Fig. S4** Effect of freeze-dry process vs. absorbance of carbon dots

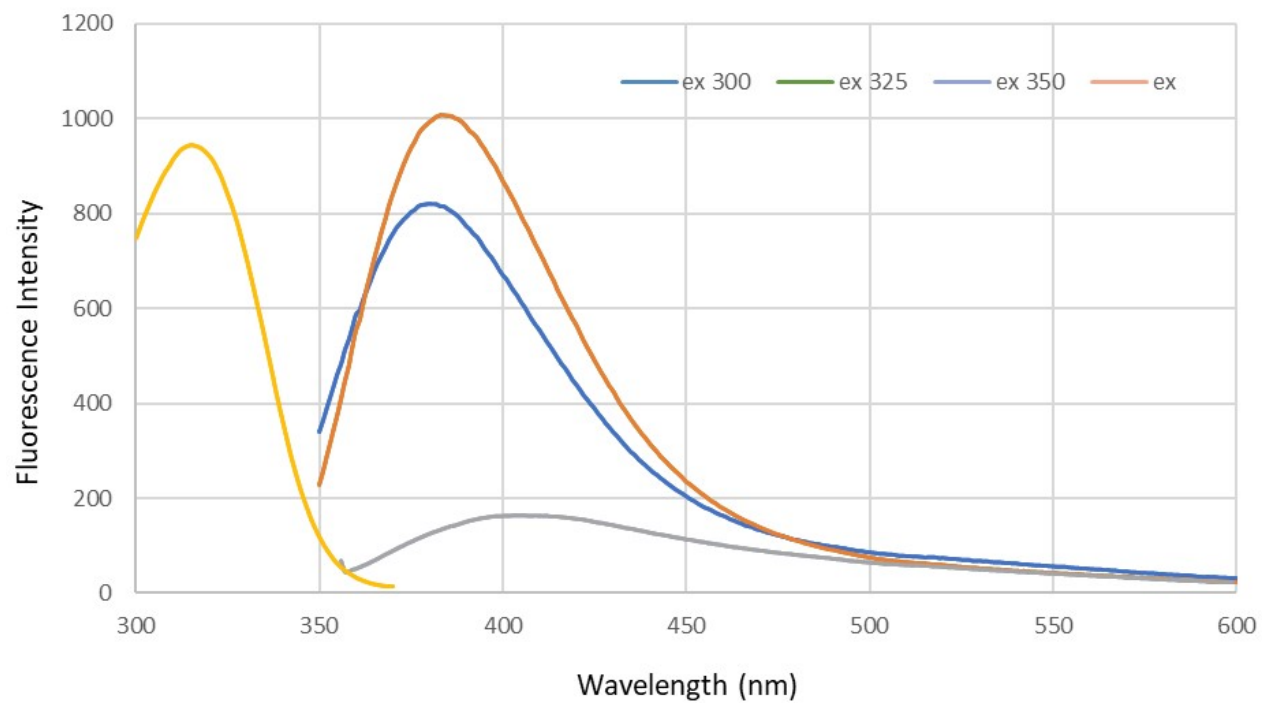

**Fig. S5** The excitation spectrum of CPKS carbon quantum dots (yellow line) and its emission spectra with various wavelengths (excitation at 300 nm, 315nm, 325nm)

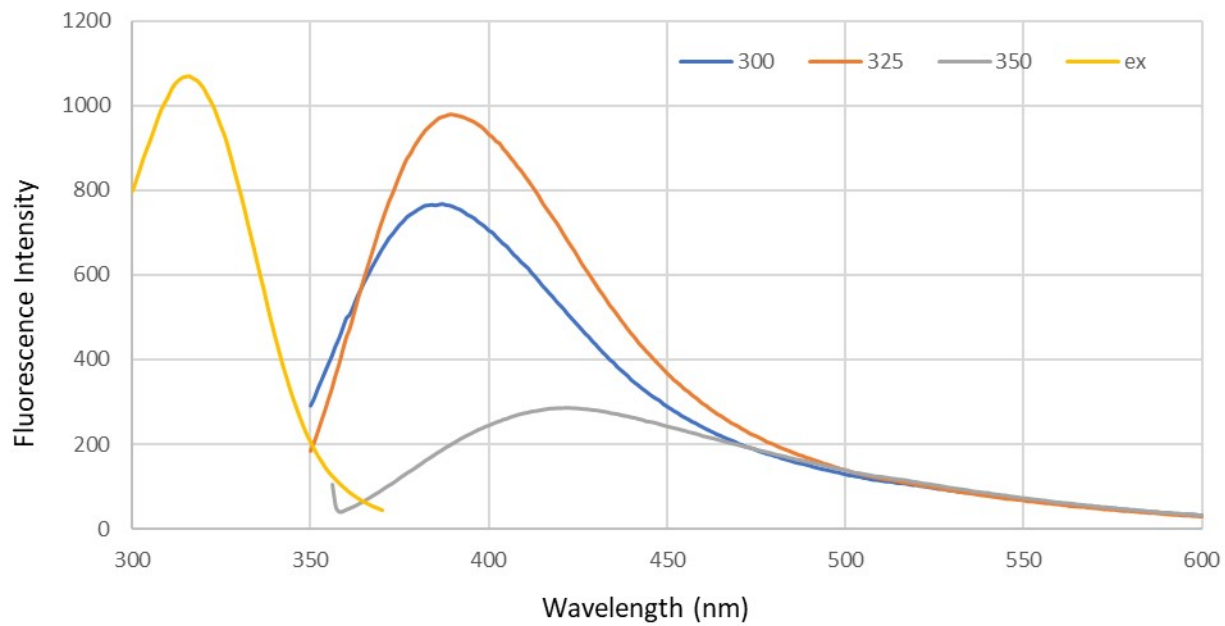

**Fig.S6** The excitation spectrum of oyster carbon quantum dots (yellow line) and its emission spectra with various wavelengths (excitation at 300 nm, 325nm, 350nm)

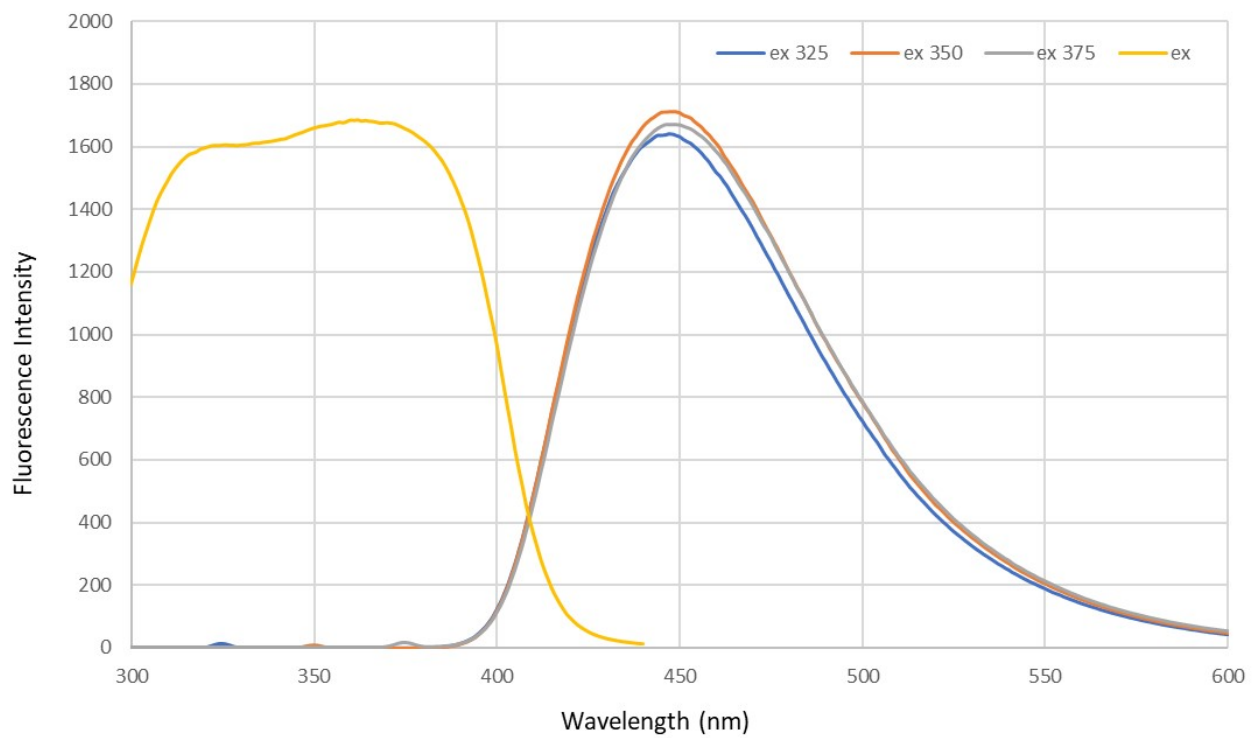

**Fig. S7** The excitation spectrum of citric acid carbon quantum dots (yellow line) and its emission spectra with various wavelengths (excitation at 325 nm, 350nm, 375nm)



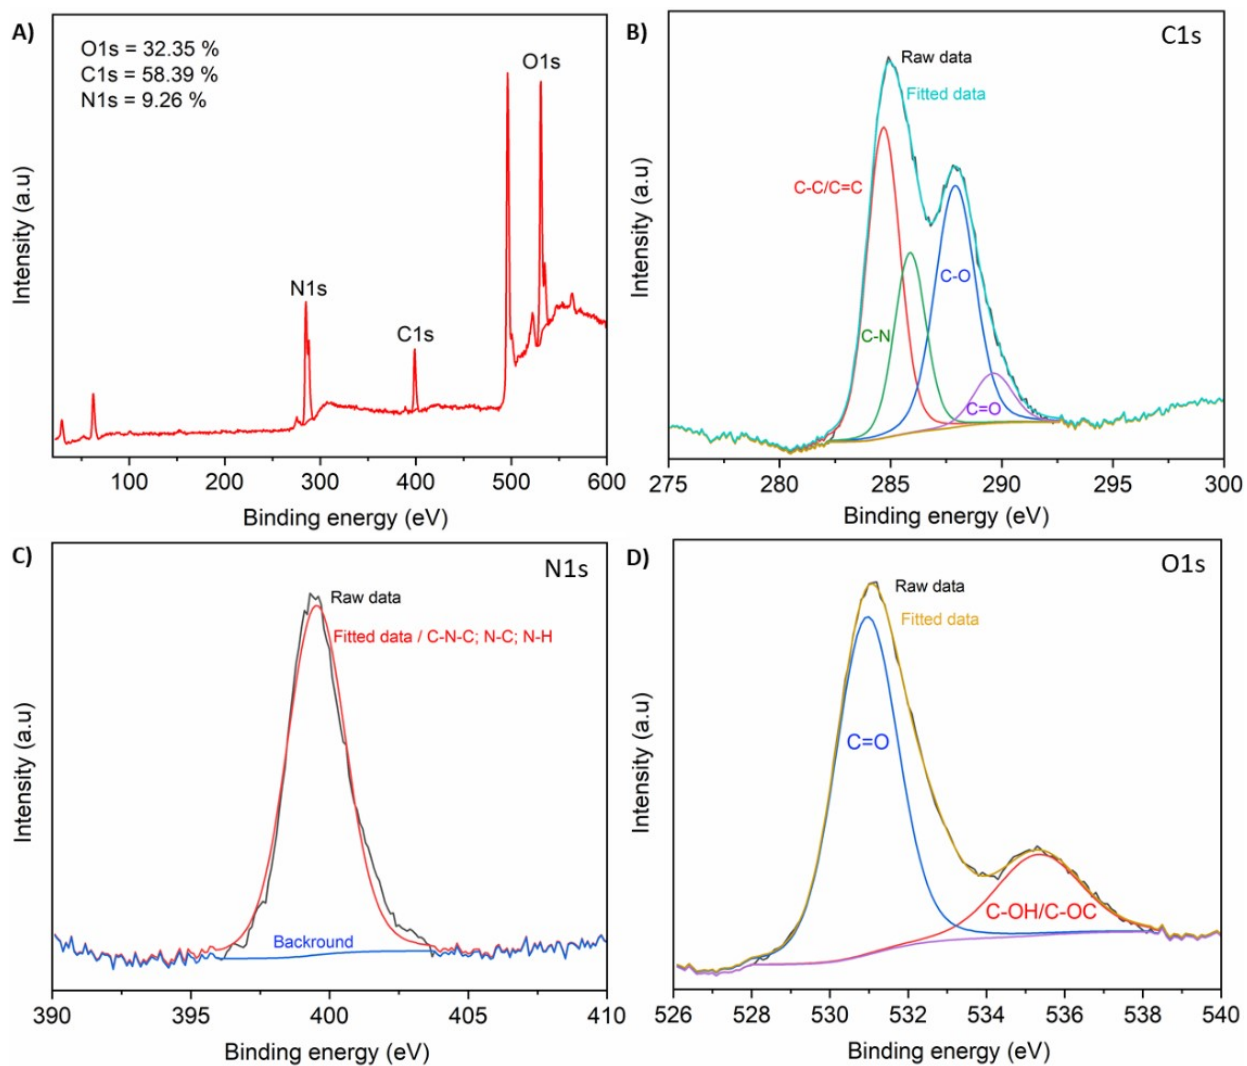

**Fig. S8** XPS full-survey spectrum of CQDs from CPKS (a); high-resolution XPS of the C1s (b), N1s (c), and O1s (d) spectra.

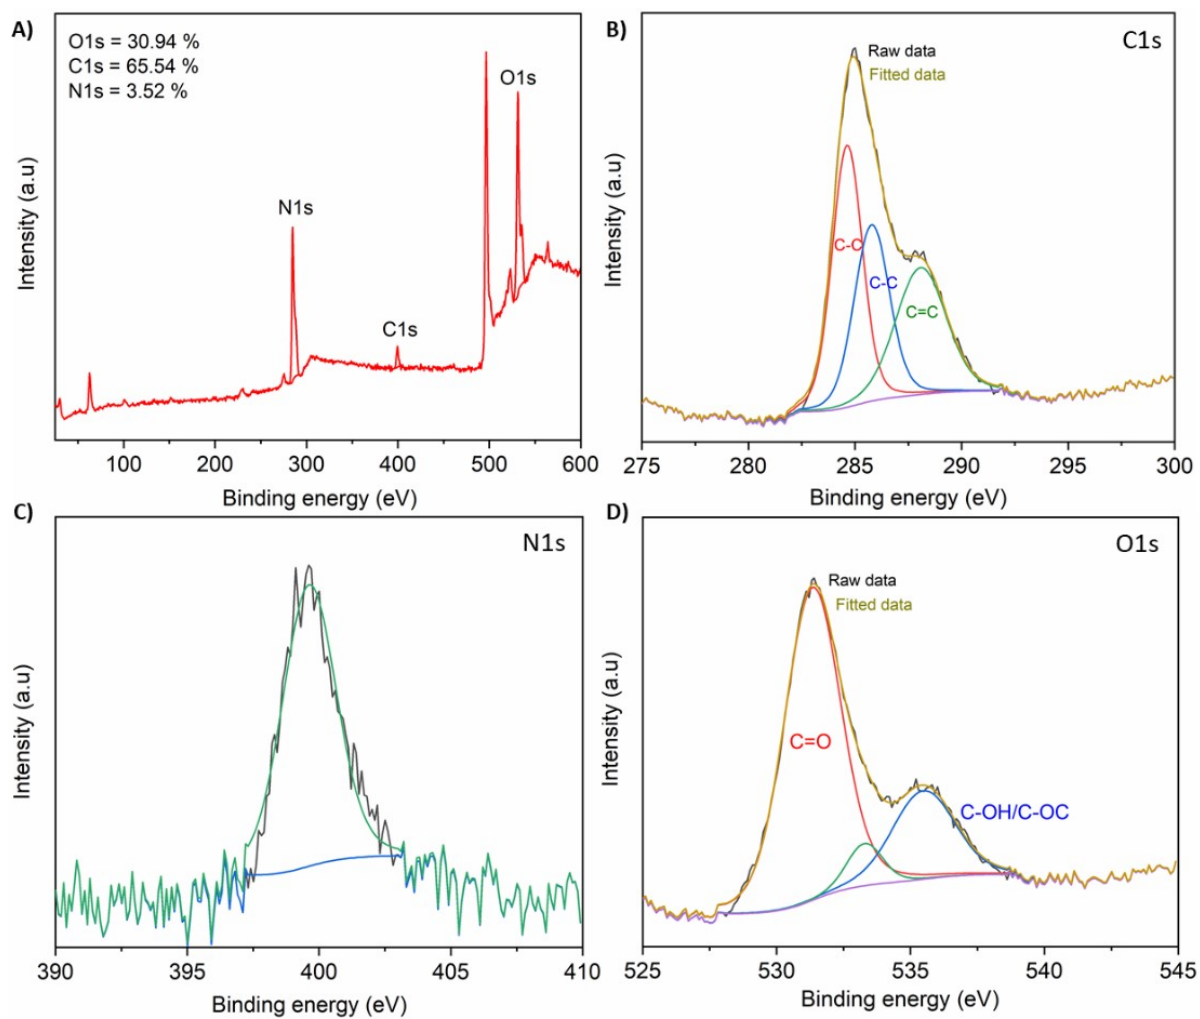

**Fig. S9** XPS full-survey spectrum of CQDs from Oyster shell (a); high-resolution XPS of the C1s (b), N1s (c), and O1s (d) spectra.

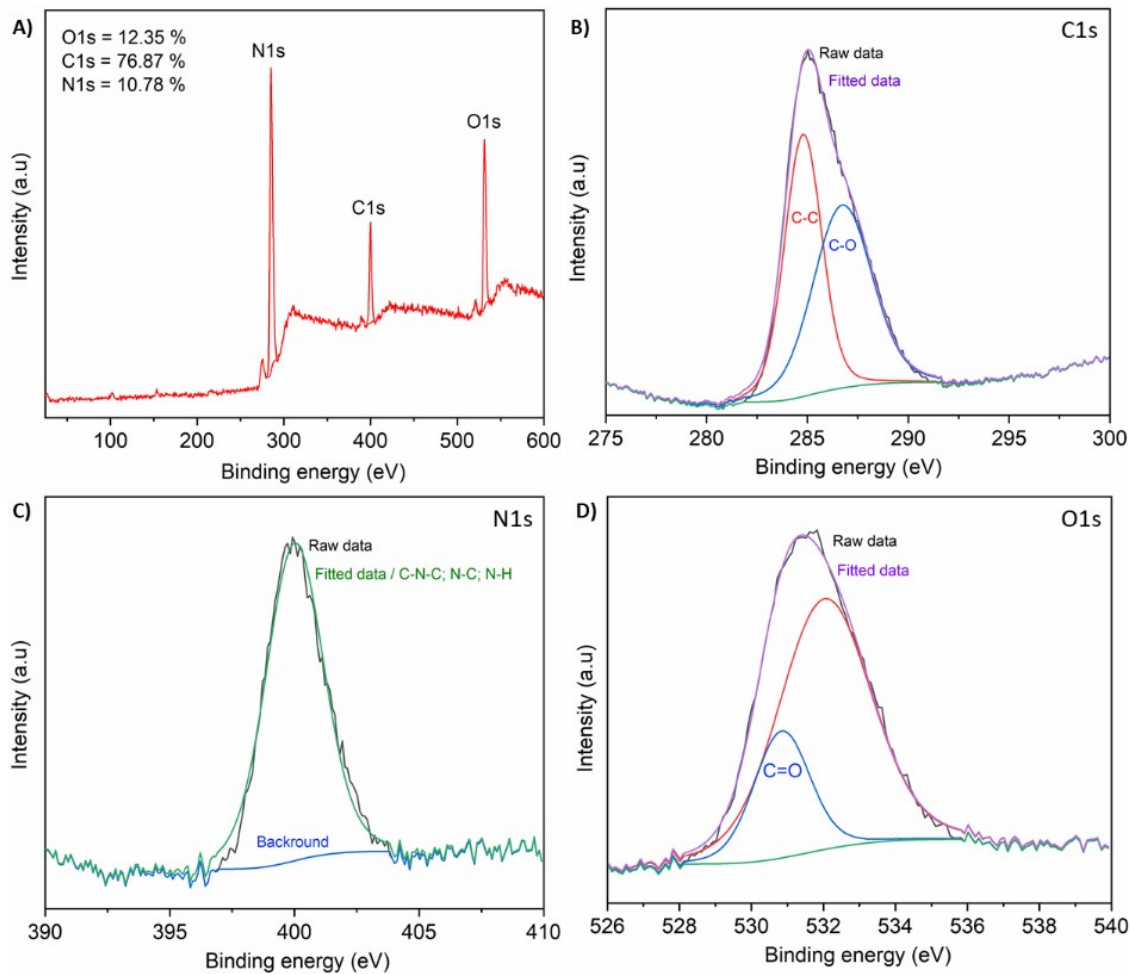

**Fig. S10** XPS full-survey spectrum of CQDs from citric acid (a); high-resolution XPS of the C1s (b), N1s (c), and O1s (d) spectra.

**Table.S1** C1s, N1s, and O1s and the relative atomic percentages of these peaks

| Type of CQDs | Binding energy (eV) |        |          |             |        |        |        | Element content (%) |       |       |
|--------------|---------------------|--------|----------|-------------|--------|--------|--------|---------------------|-------|-------|
|              | C-C, C-H            | C-N    | C-N, C-O | C=O, OH-C-H | O=C    | O-C    | R-NH-R | C                   | O     | N     |
| CPKS         | 284.68              | 285.87 | 287.90   | 289.61      | 530.95 | 532.35 | 399.3  | 58.39               | 32.35 | 9.26  |
| Oyster shell | 284.63              | 285.78 | 288.08   |             | 531.34 | 533.29 | 399.11 | 65.54               | 30.94 | 3.52  |
| Citric acid  | 284.79              | 286.73 |          |             | 530.84 | 532.03 | 399.92 | 76.87               | 12.35 | 10.78 |

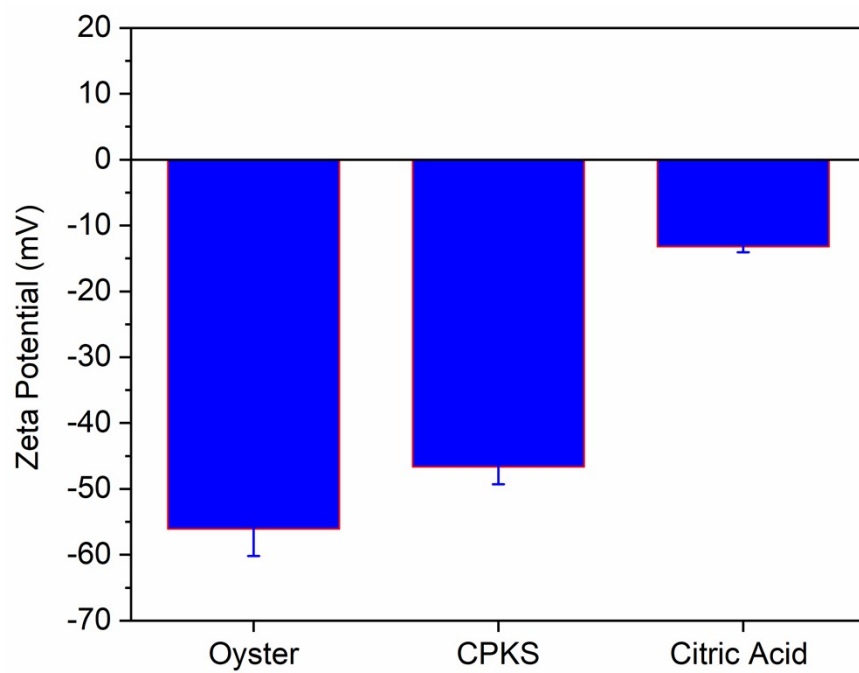

**Fig. S11** Zeta potential measurement of synthesized QDs from three different sources.

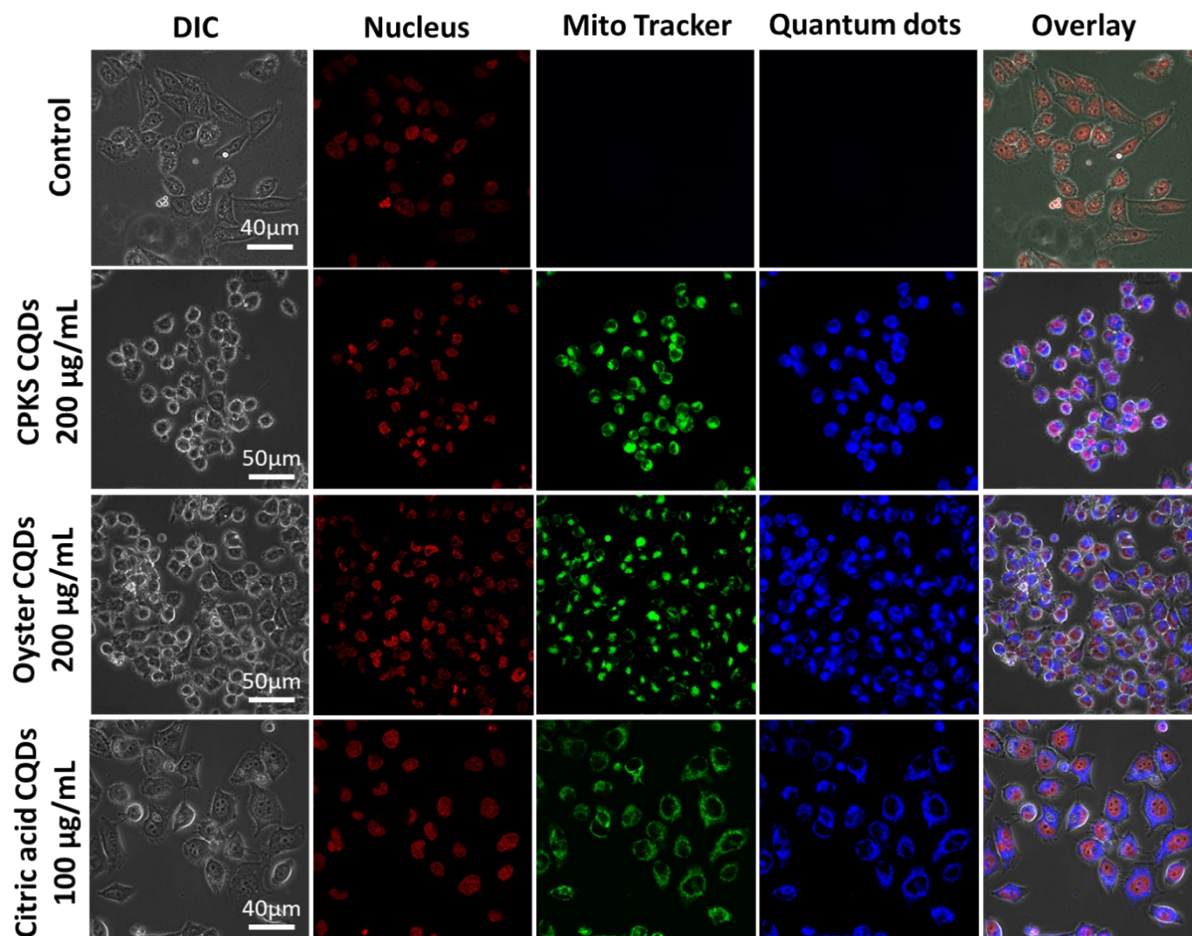

**Fig. S12** Mitochondrial localization using CPKS, Oyster, and Citric acid-based CQDs with HeLa cells.

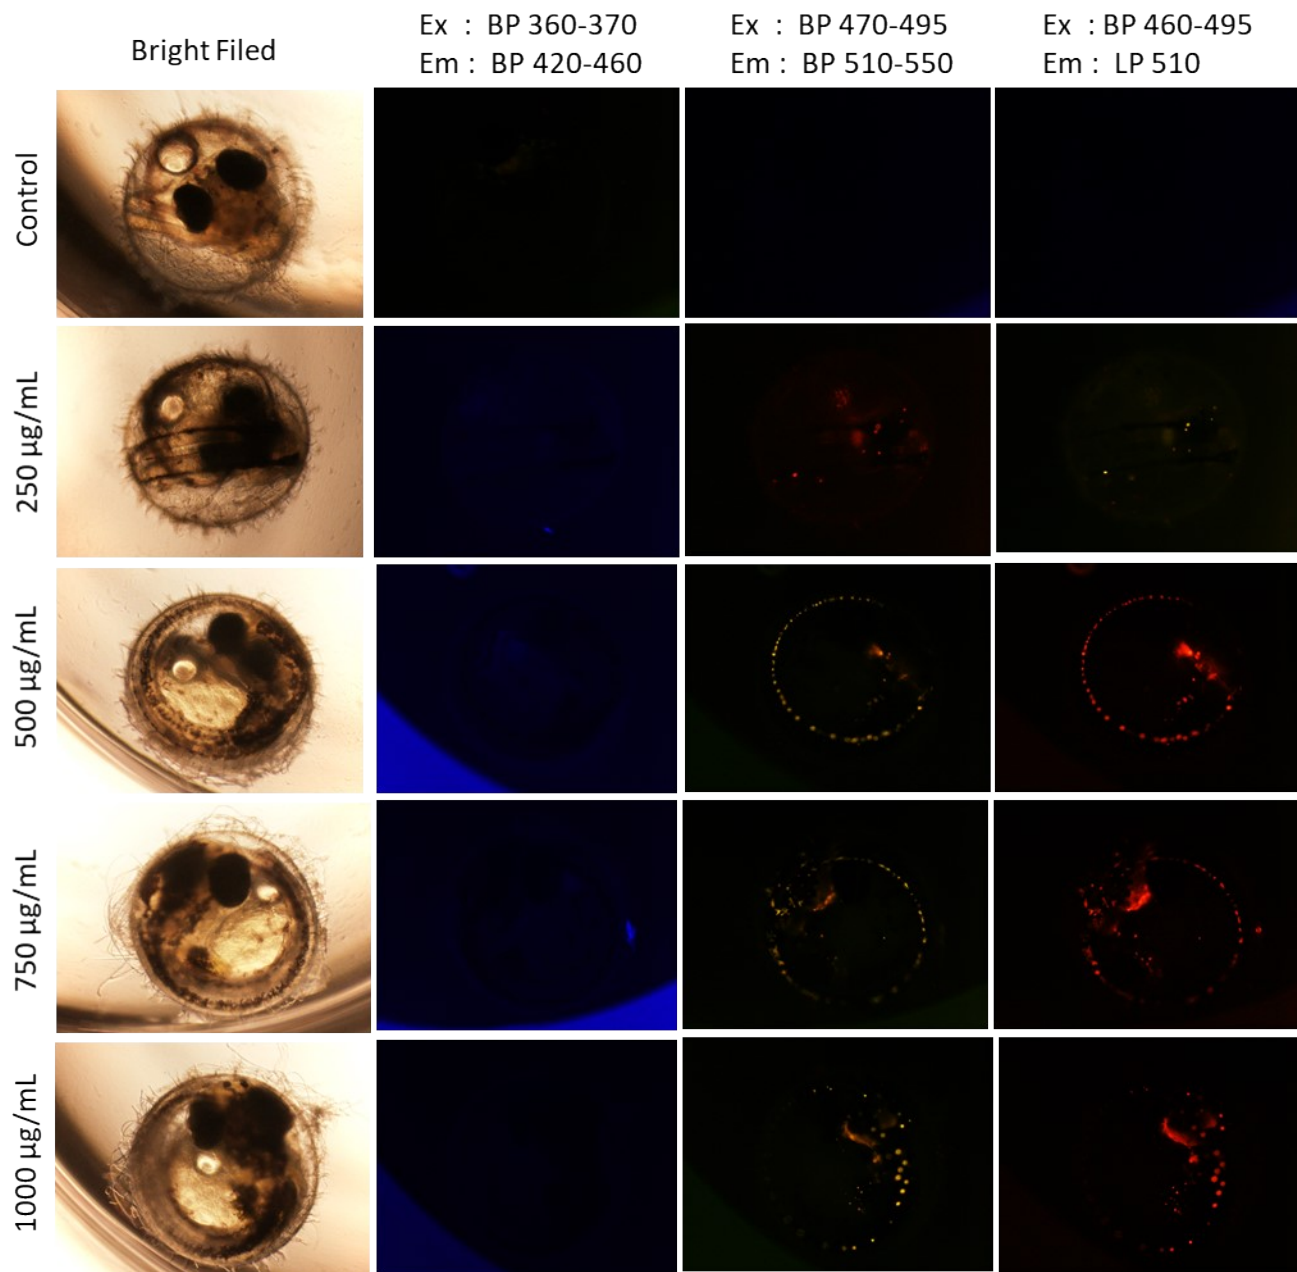

**Fig. S13** Medaka egg (day-9) with increasing concentrations of CPKS - QDs 250, 500, 750 and 1000  $\mu\text{g mL}^{-1}$ . Three eggs were used for each micelle concentration  $\pm$  S.E. ( $n = 3$ ).



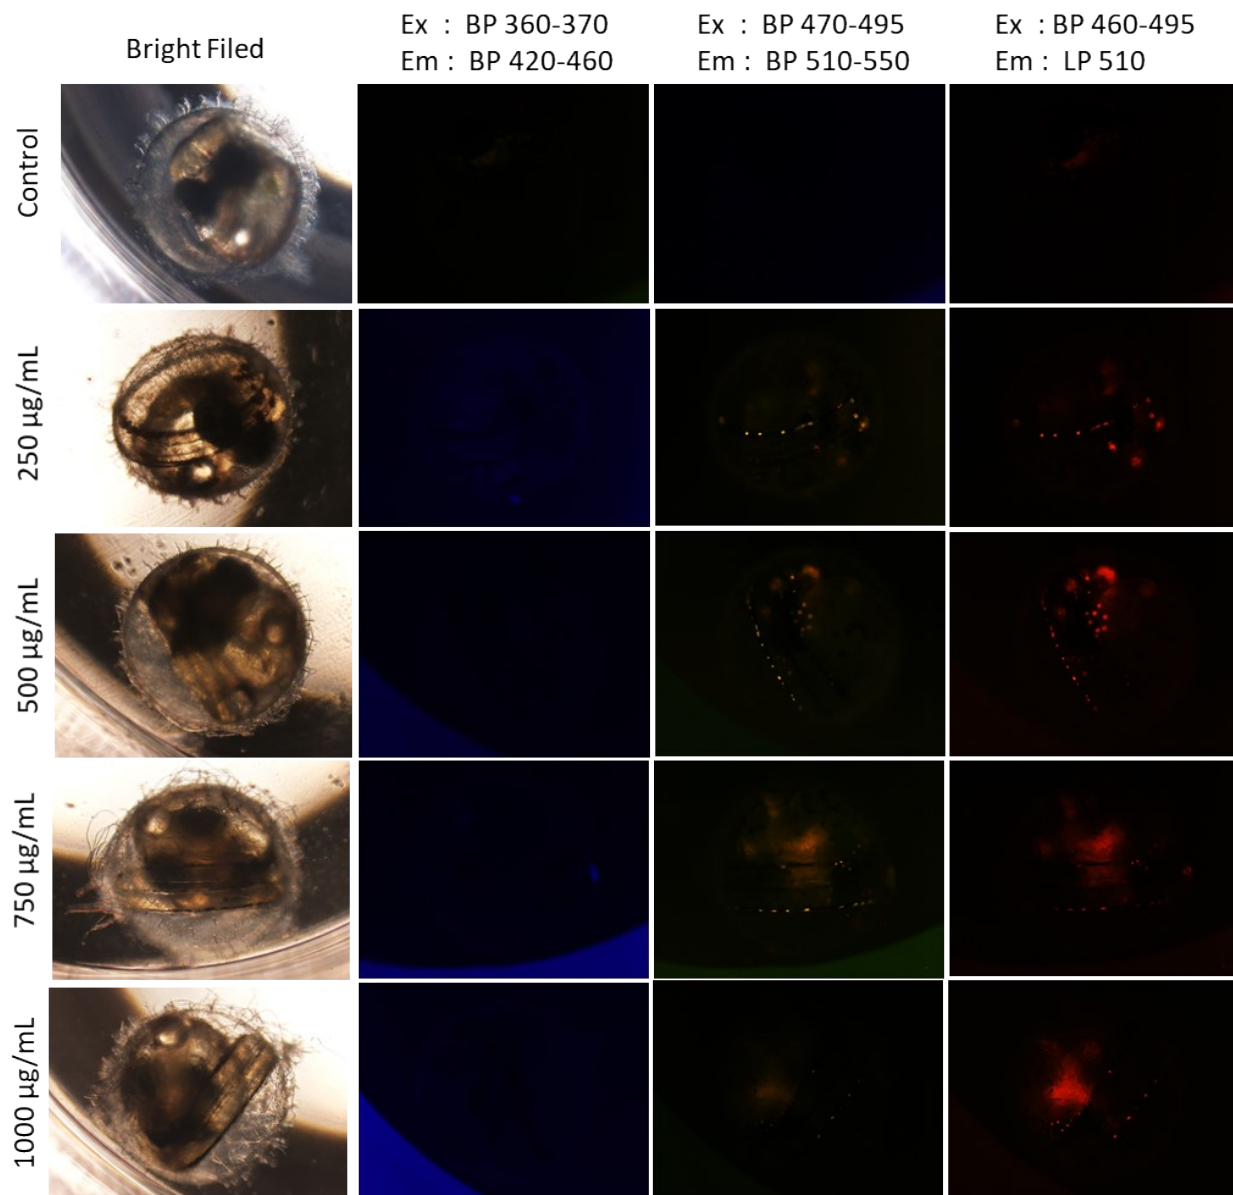

**Fig. S14** Medaka egg (day-11) with increasing concentrations of CPKS - QDs 250, 500, 750 and 1000  $\mu\text{g mL}^{-1}$ . Three eggs were used for each micelle concentration  $\pm$  S.E. ( $n = 3$ ).

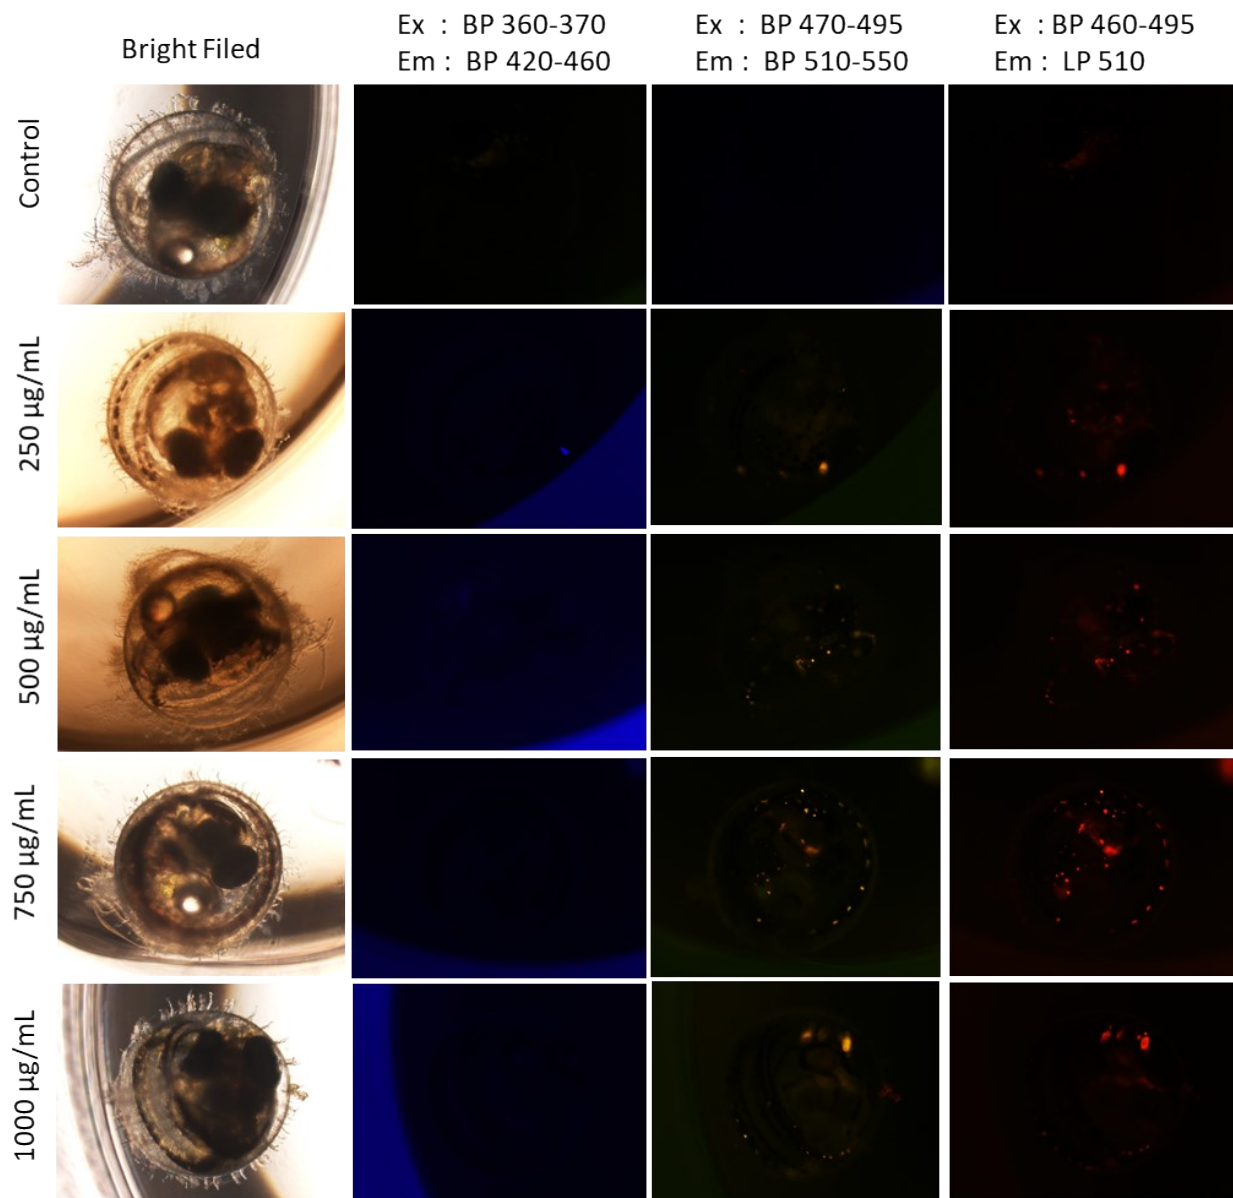

**Fig. S15** Medaka egg (day-14) with increasing concentrations of CPKS - QDs 250, 500, 750 and 1000  $\mu\text{g mL}^{-1}$ . Three eggs were used for each micelle concentration  $\pm$  S.E. ( $n = 3$ ).



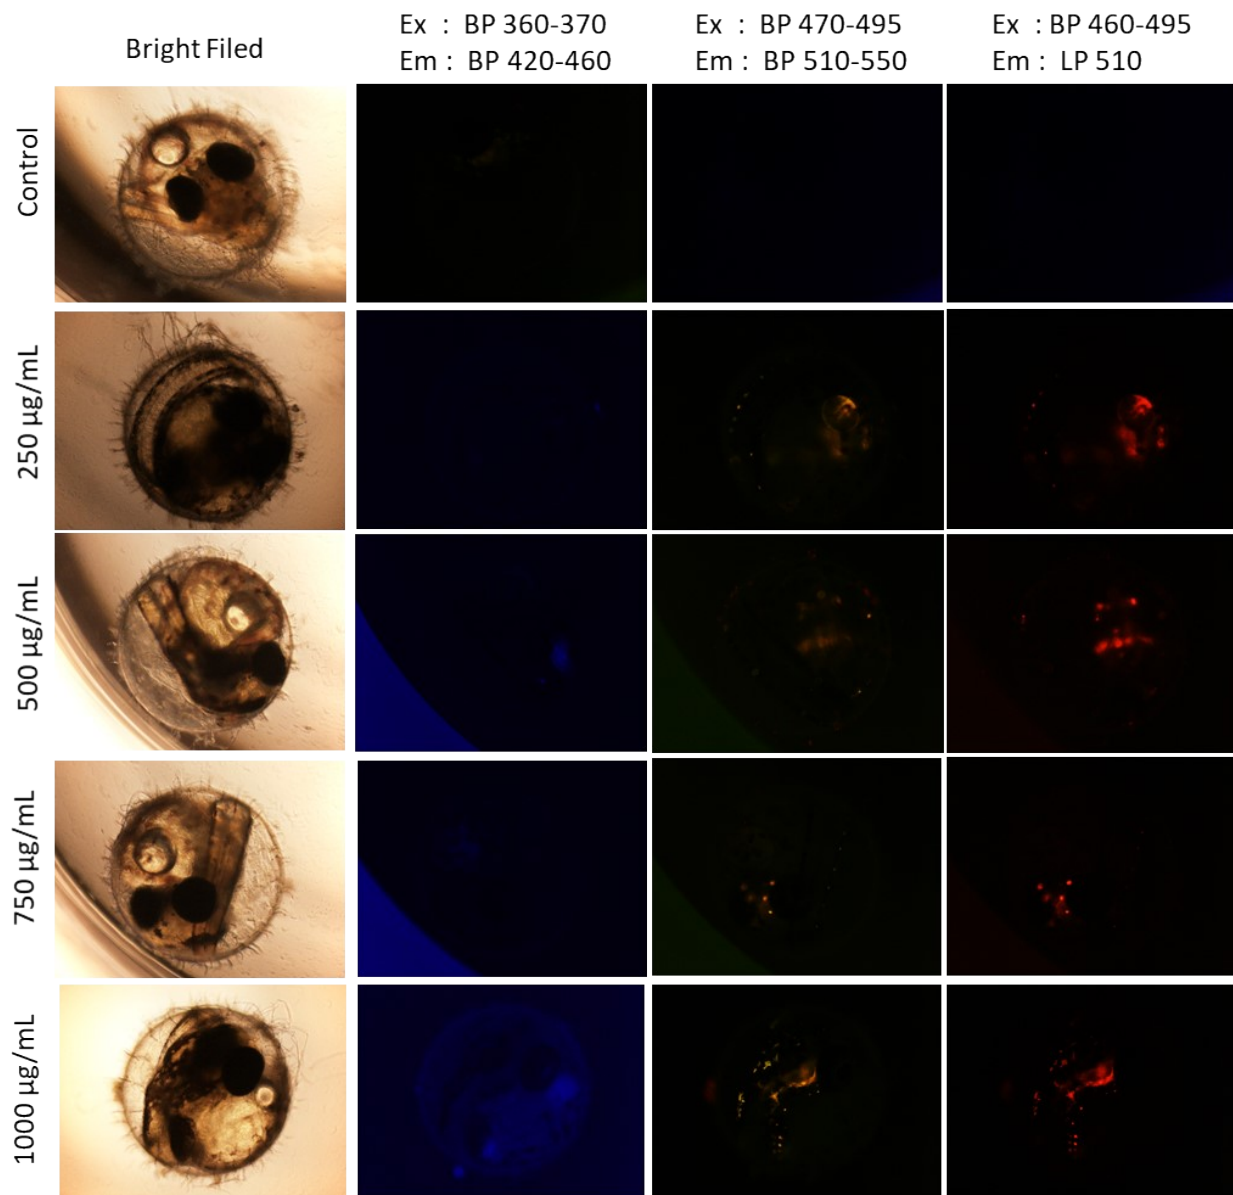

**Fig. S16** Medaka egg (day-9) with increasing concentrations of **Oyster - QDs** 250, 500, 750 and 1000  $\mu\text{g mL}^{-1}$ . Three eggs were used for each micelle concentration  $\pm$  S.E. ( $n = 3$ ).

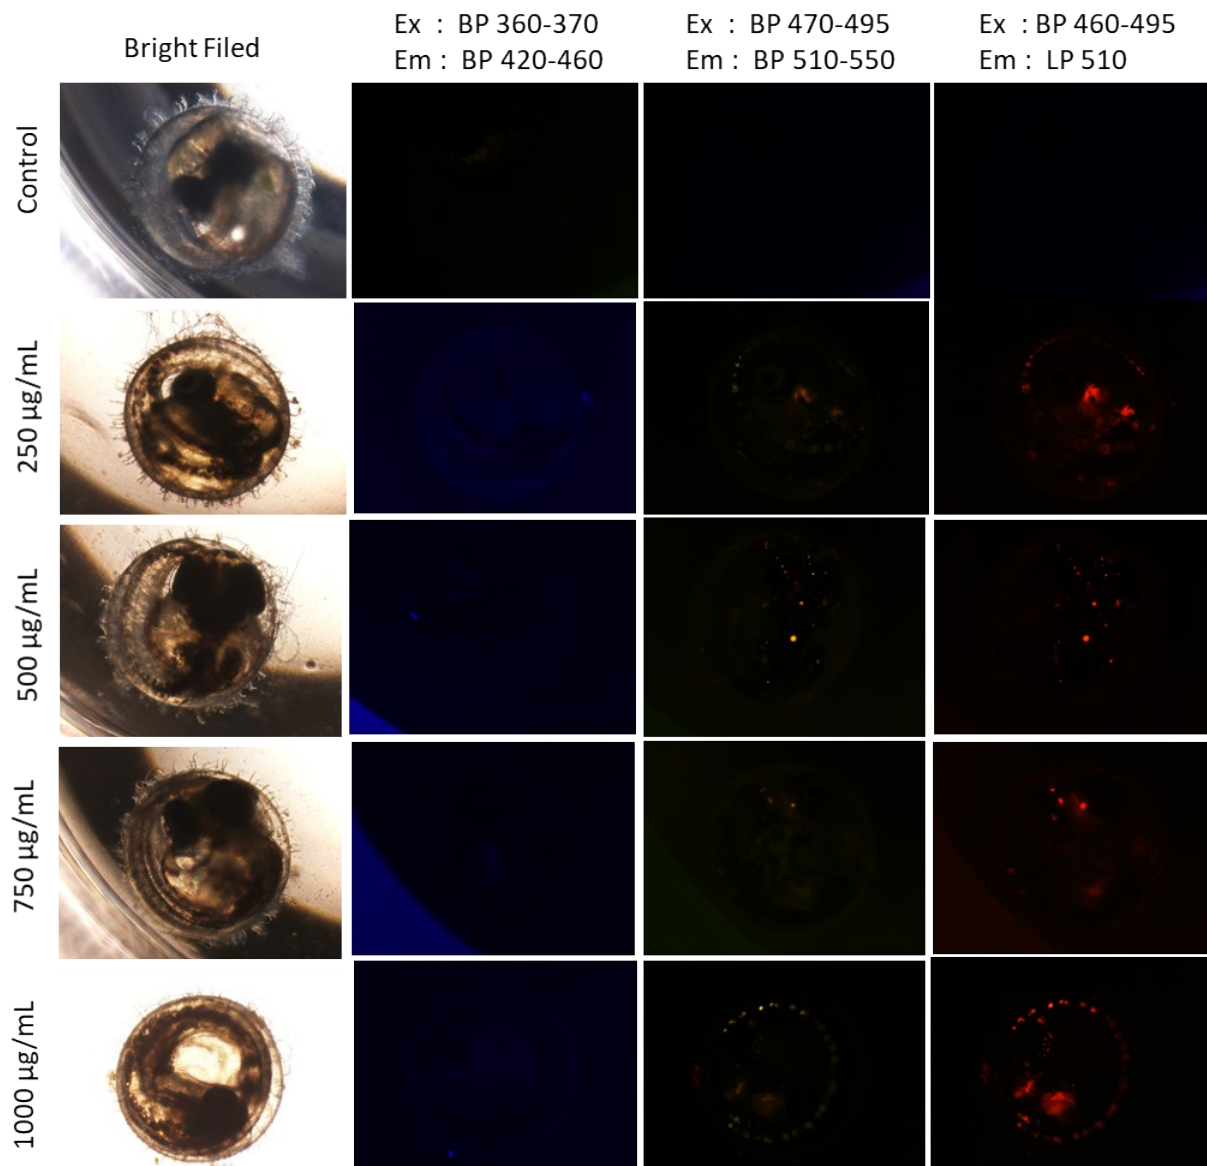

**Fig. S17** Medaka egg (day-11) with increasing concentrations of **Oyster - QDs** 250, 500, 750, and 1000  $\mu\text{g mL}^{-1}$ . Three eggs were used for each micelle concentration  $\pm$  S.E. ( $n = 3$ ).

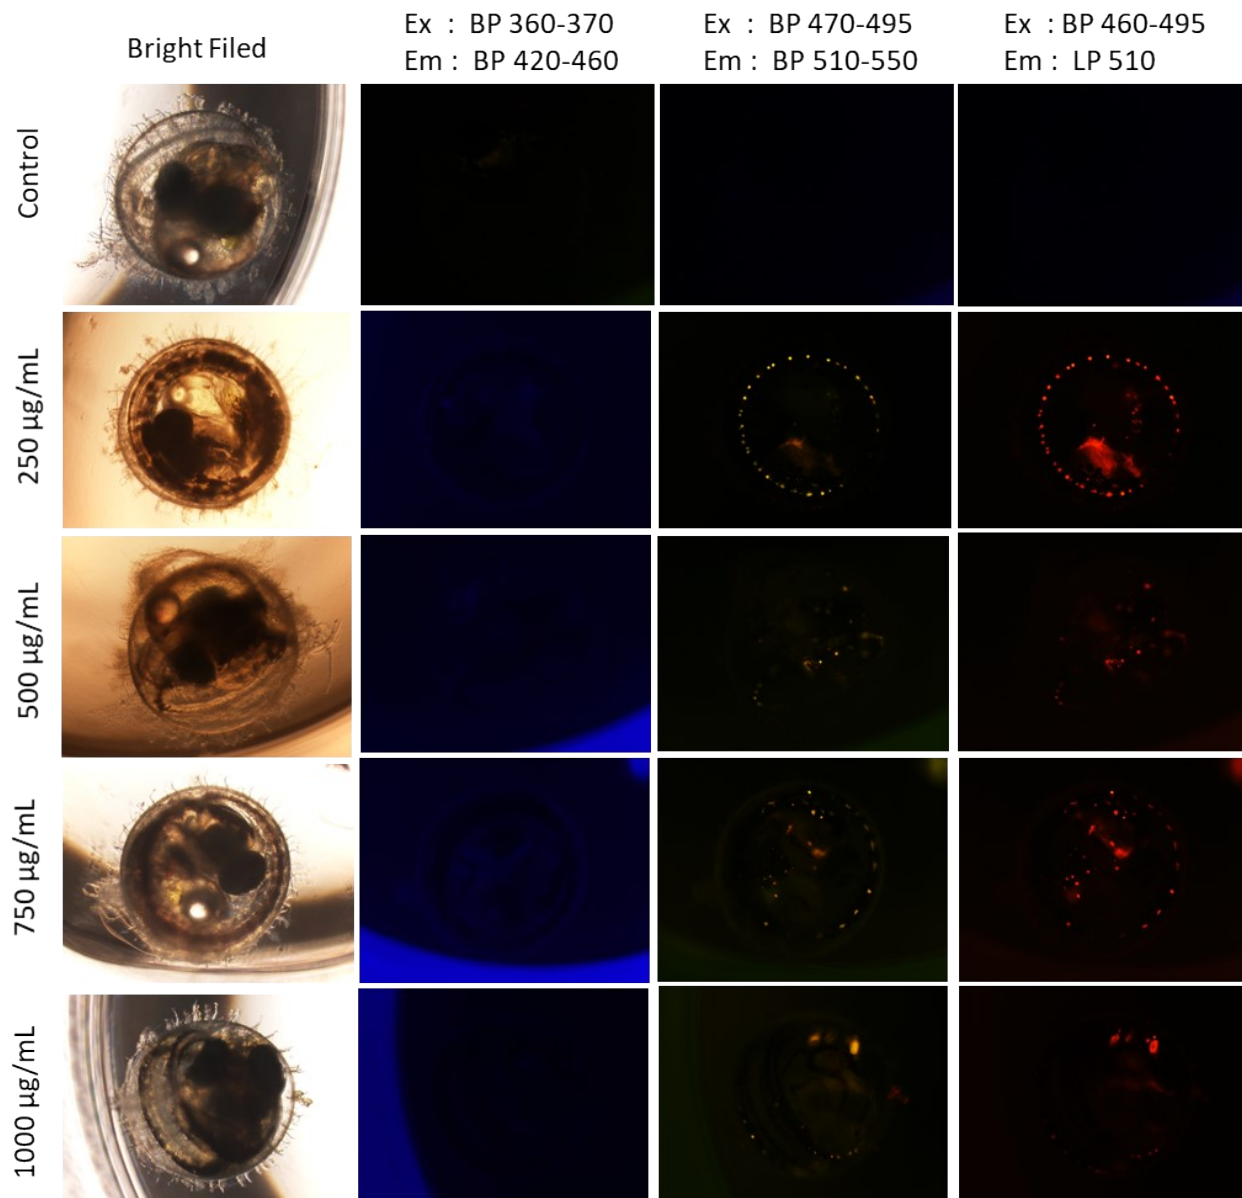

**Fig. S18** Medaka egg (day-14) with increasing concentrations of **Oyster - QDs** 250, 500, 750 and 1000  $\mu\text{g mL}^{-1}$ . Three eggs were used for each micelle concentration  $\pm$  S.E. ( $n = 3$ ).

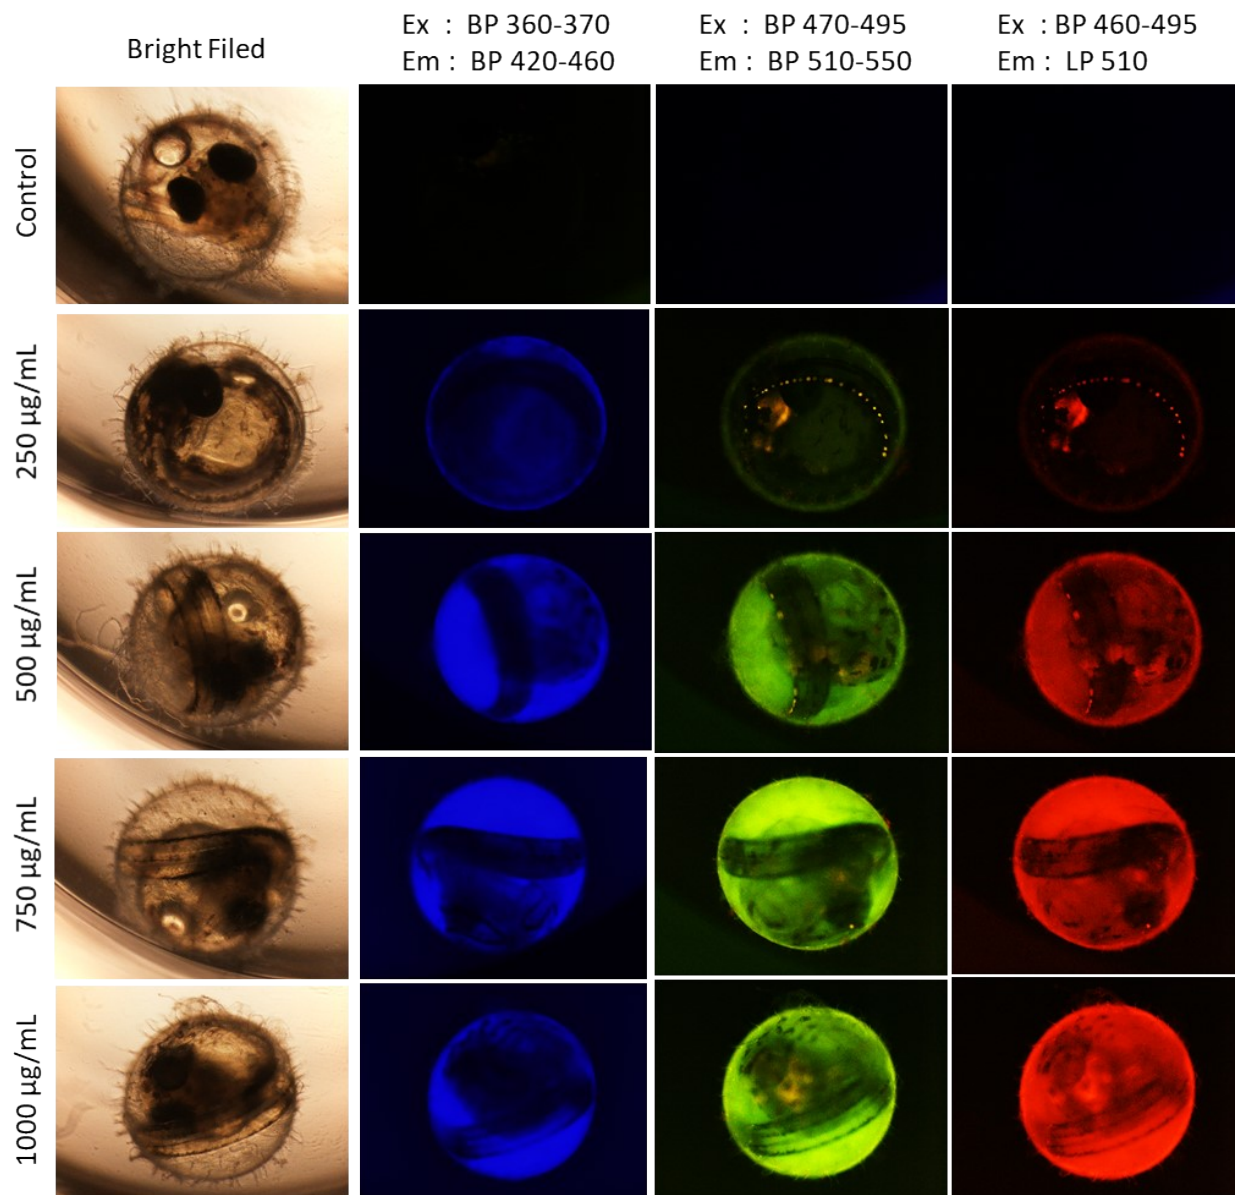

**Fig. S19** Medaka egg (day-9) with increasing concentrations of CA-QDs 250, 500, 750 and 1000  $\mu\text{g mL}^{-1}$ . Three eggs were used for each micelle concentration  $\pm$  S.E. ( $n = 3$ ).



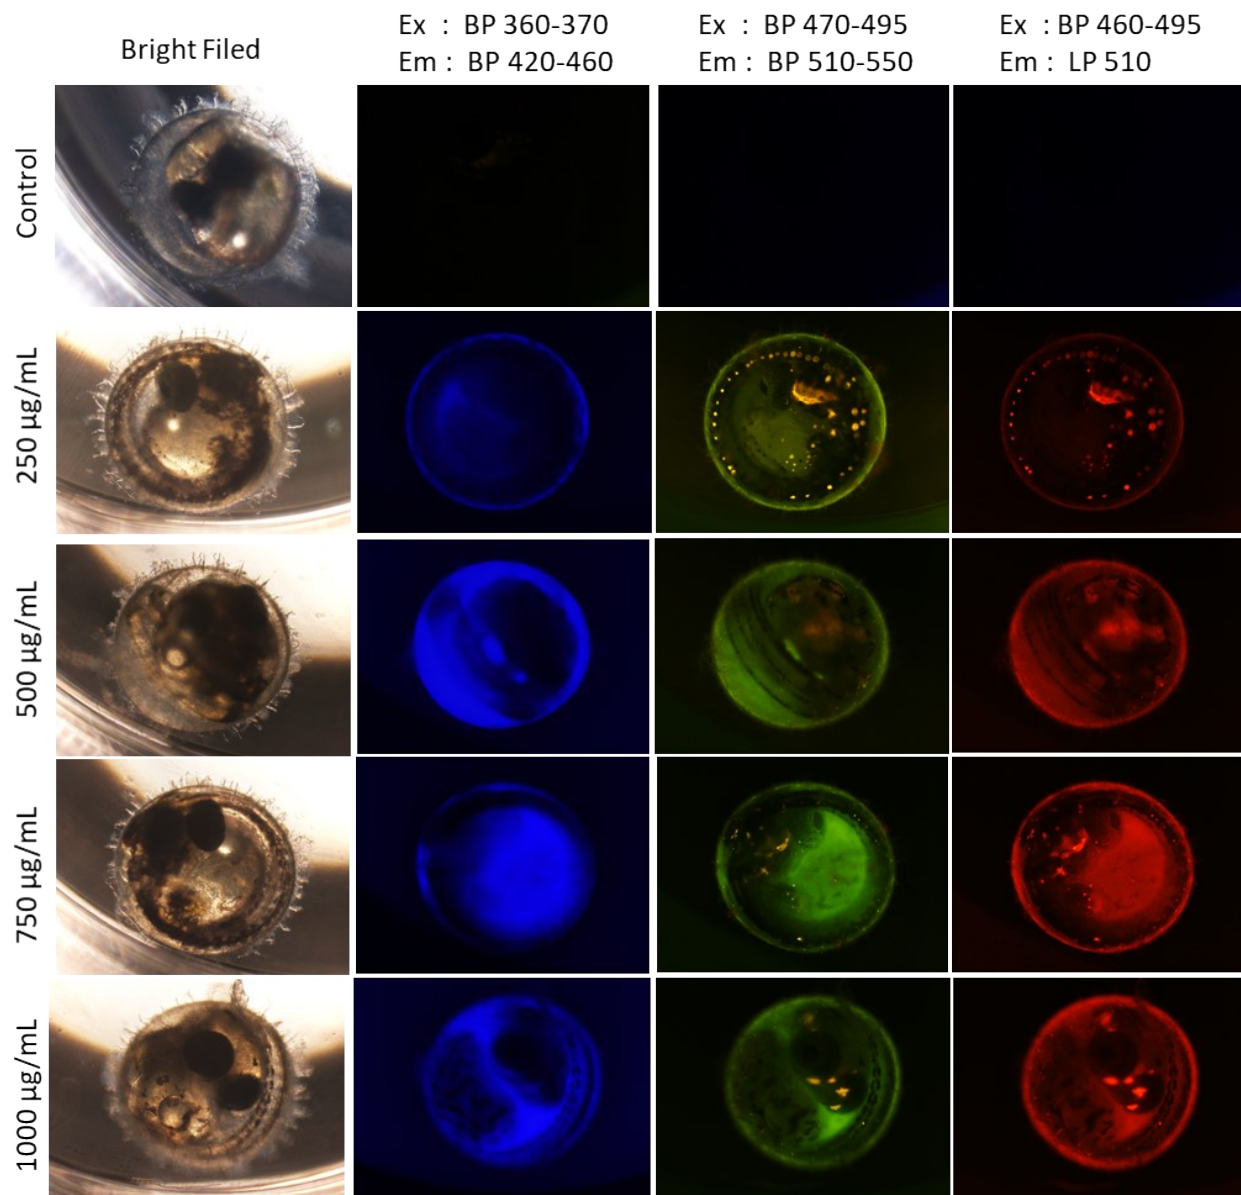

**Fig. S20** Medaka egg (day-11) with increasing concentrations of CA-QDs 250, 500, 750, and 1000  $\mu\text{g mL}^{-1}$ . Three eggs were used for each micelle concentration  $\pm$  S.E. ( $n = 3$ ).

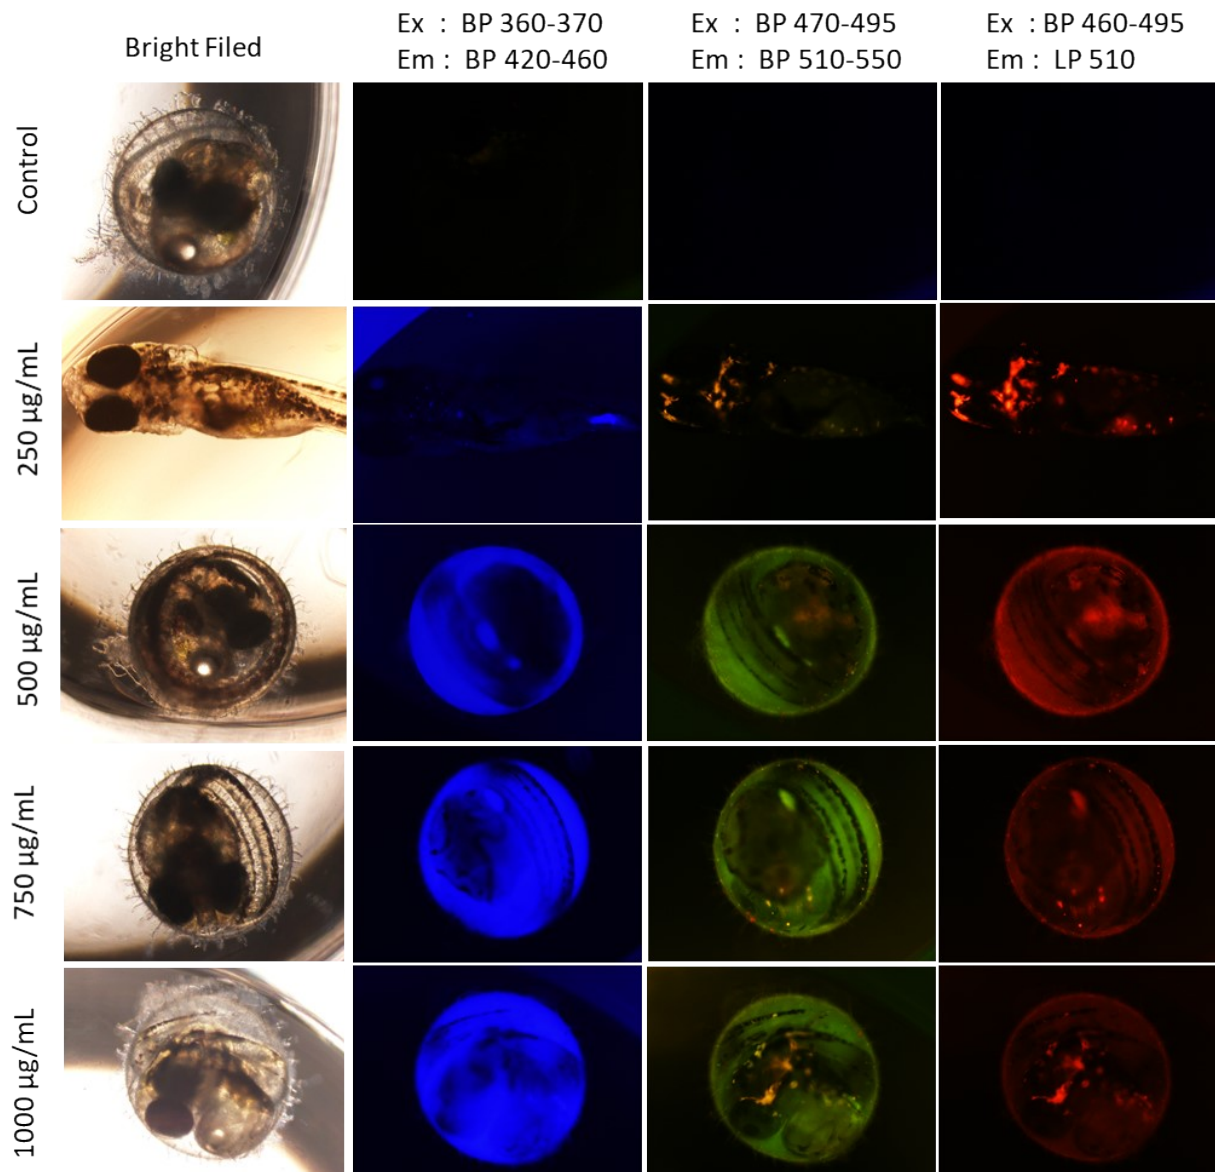

**Fig. S21** Medaka egg (day-14) with increasing concentrations of CA-QDs 250, 500, 750 and 1000  $\mu\text{g mL}^{-1}$ . Three eggs were used for each micelle concentration  $\pm$  S.E. ( $n = 3$ ).
